# Supplementary material for: Digital PBL-CBL teaching method improves students’ performance in learning complex implant cases in atrophic anterior maxilla
Source: PeerJ. 2023 Dec 6;11:e16496. doi: 10.7717/peerj.16496 (PMC10710131; doi:10.7717/peerj.16496)
Supplement: Supplemental Information 1 [file peerj-11-16496-s001.xlsx]

## Sheet: The rate of satisfaction 
		Control(n=18)					Traditional PBL-CBL(n=18)							Digital PBL-CBL(n=18)
		items surveyed	Yes	No	rate of satisfaction		items surveyed	Yes	No	rate of satisfaction				items surveyed		Yes		No		rate of satisfaction
		1.I like this approach	14	4	0.777778		1.I like this approach	15	3	0.833333				1.I like this approach		17		1		0.944444
		2.This approach is efficient	8	10	0.444444		2.This approach is efficient	12	6	0.666667				2.This approach is efficient		16		2		0.888889
		3.This approach decreases extracurricular work	15	3	0.833333		3.This approach decreases extracurricular work	10	8	0.555556				3.This approach decreases extracurricular work		10		8		0.555556
		4.This approach makes learning more targeted and more interesting interesting	7	11	0.388889		4.This approach makes learning more targeted and more interesting	11	7	0.611111				4.This approach makes learning more targeted and more interesting		17		1		0.944444
		5.This approach enhances my ability to analyze and solve problems problems	8	10	0.444444		5.This approach enhances my ability to analyze and solve problems	12	6	0.666667				5.This approach enhances my ability to analyze and solve problems		17		1		0.944444
		6.This approach helps me master theoretical knowledge	11	7	0.611111		6.This approach helps me master theoretical knowledge	10	8	0.555556				6.This approach helps me master theoretical knowledge		16		2		0.888889
		7.This approach helps me improve clinical skills	6	12	0.333333		7.This approach helps me improve clinical skills	8	10	0.444444				7.This approach helps me improve clinical skills		17		1		0.944444
		8.This approach facilitates clinician-patient communication	3	15	0.166667		8.This approach facilitates clinician-patient communication	9	9	0.5				8.This approach facilitates clinician-patient communication		16		2		0.888889
