# Supplementary material for: Digital PBL-CBL teaching method improves students’ performance in learning complex implant cases in atrophic anterior maxilla
Source: PeerJ. 2023 Dec 6;11:e16496. doi: 10.7717/peerj.16496 (PMC10710131; doi:10.7717/peerj.16496)
Supplement: Supplemental Information 2 [file peerj-11-16496-s002.xlsx]

## Sheet: Sheet1
NO.	theory test	case analysis test	Total score
Control group1	56	13	69
Control group2	45	15	60
Control group3	66	13	79
Control group4	34	8	42
Control group5	37	22	59
Control group6	46	16	62
Control group7	34	13	47
Control group8	57	19	76
Control group9	63	16	79
Control group10	61	17	78
Control group11	57	20	77
Control group12	45	6	51
Control group13	32	7	39
Control group14	37	15	52
Control group15	24	18	42
Control group16	52	12	64
Control group17	36	11	47
Control group18	30	8	38
Traditional PBL-CBL group1	64	12	76
Traditional PBL-CBL group2	55	15	70
Traditional PBL-CBL group3	45	16	61
Traditional PBL-CBL group4	45	12	57
Traditional PBL-CBL group5	46	21	67
Traditional PBL-CBL group6	48	12	60
Traditional PBL-CBL group7	57	12	69
Traditional PBL-CBL group8	66	18	84
Traditional PBL-CBL group9	69	6	75
Traditional PBL-CBL group10	68	5	73
Traditional PBL-CBL group11	53	15	68
Traditional PBL-CBL group12	35	18	53
Traditional PBL-CBL group13	48	11	59
Traditional PBL-CBL group14	63	5	68
Traditional PBL-CBL group15	58	22	80
Traditional PBL-CBL group16	68	21	89
Traditional PBL-CBL group17	58	11	69
Traditional PBL-CBL group18	48	21	69
Digital PBL-CBL group1	57	23	80
Digital PBL-CBL group2	74	23	97
Digital PBL-CBL group3	57	25	82
Digital PBL-CBL group4	68	19	87
Digital PBL-CBL group5	62	20	82
Digital PBL-CBL group6	71	15	86
Digital PBL-CBL group7	57	17	74
Digital PBL-CBL group8	62	18	80
Digital PBL-CBL group9	56	18	74
Digital PBL-CBL group10	58	21	79
Digital PBL-CBL group11	70	25	95
Digital PBL-CBL group12	66	22	88
Digital PBL-CBL group13	63	22	85
Digital PBL-CBL group14	54	20	74
Digital PBL-CBL group15	61	18	79
Digital PBL-CBL group16	52	15	67
Digital PBL-CBL group17	49	19	68
Digital PBL-CBL group18	61	21	82
